# Supplementary material
Source: ML conference proceedings conference paper supplement (https://openreview.net/forum?id=JewzobRhay)

Attention block outputs at the 20 position without prefixes

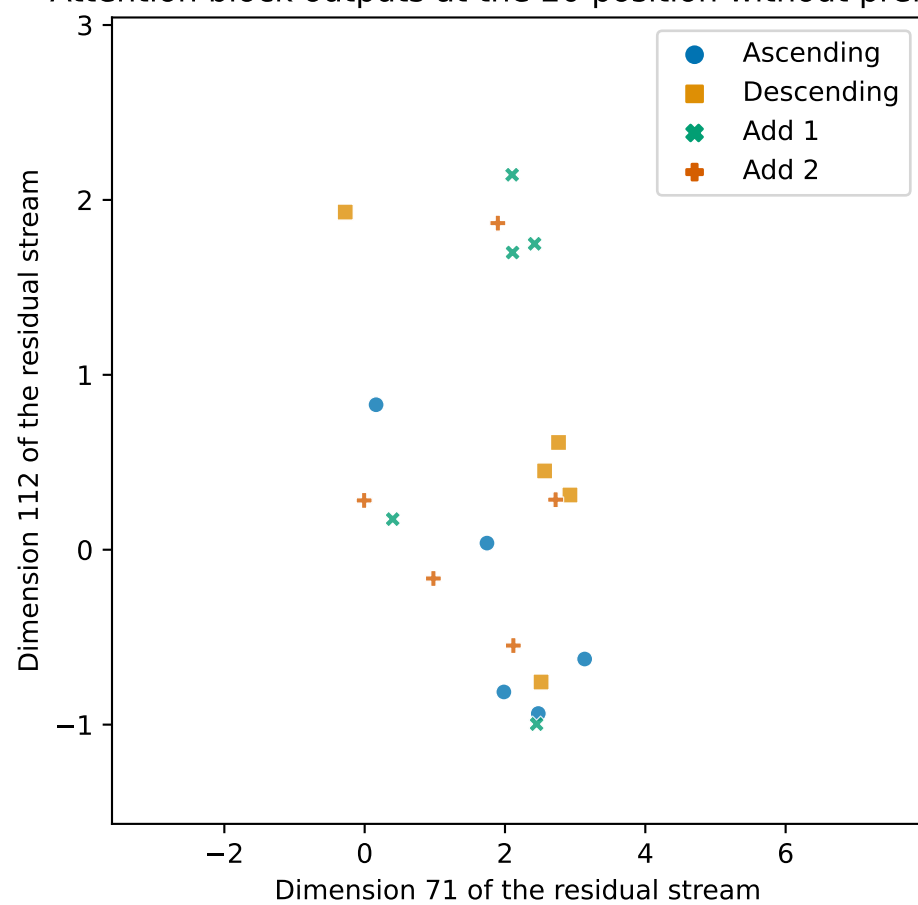

Attention block outputs at the 20 position with prefixes

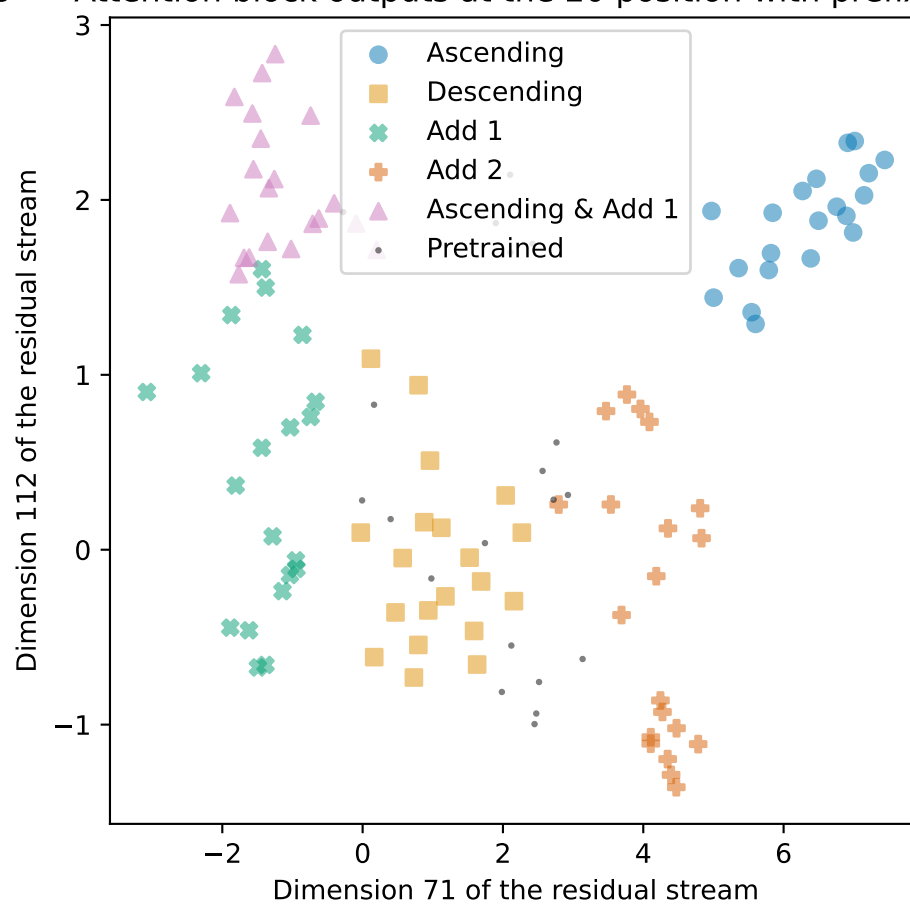

Supplement: supplementary_material [file attachment]
