# Supplementary material
Source: ML conference proceedings conference paper supplement (https://openreview.net/forum?id=JewzobRhay)

# Prefix-tuned attention

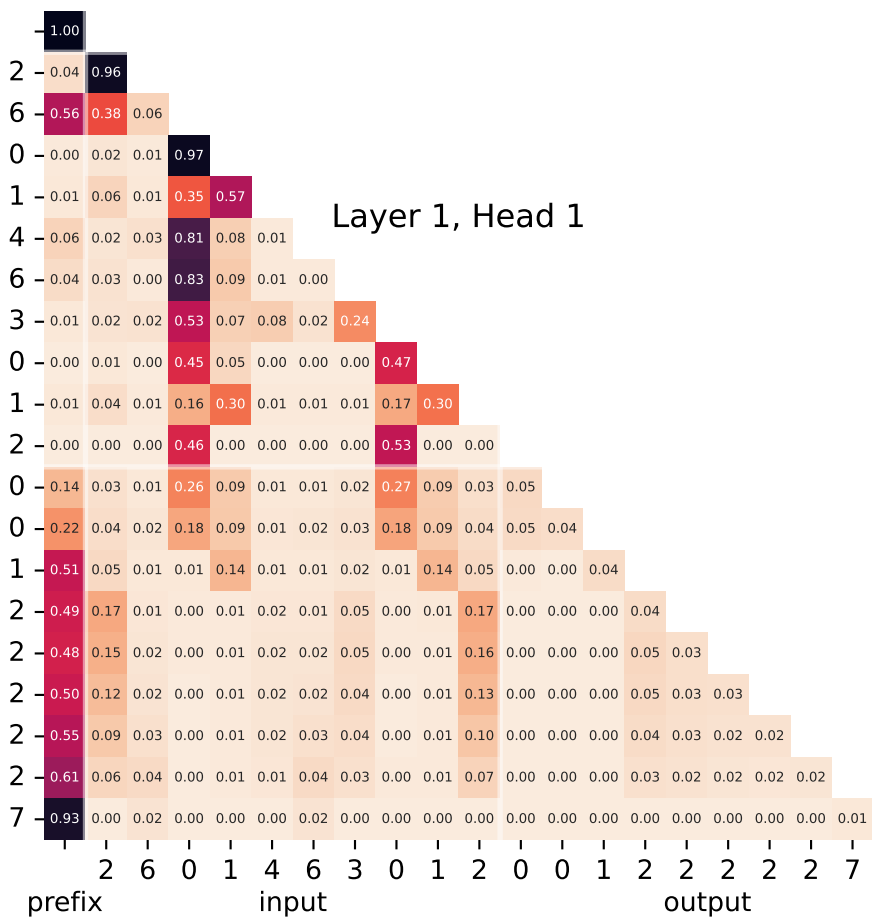

Supplement: supplementary_material [file attachment]

## Descending sort attention

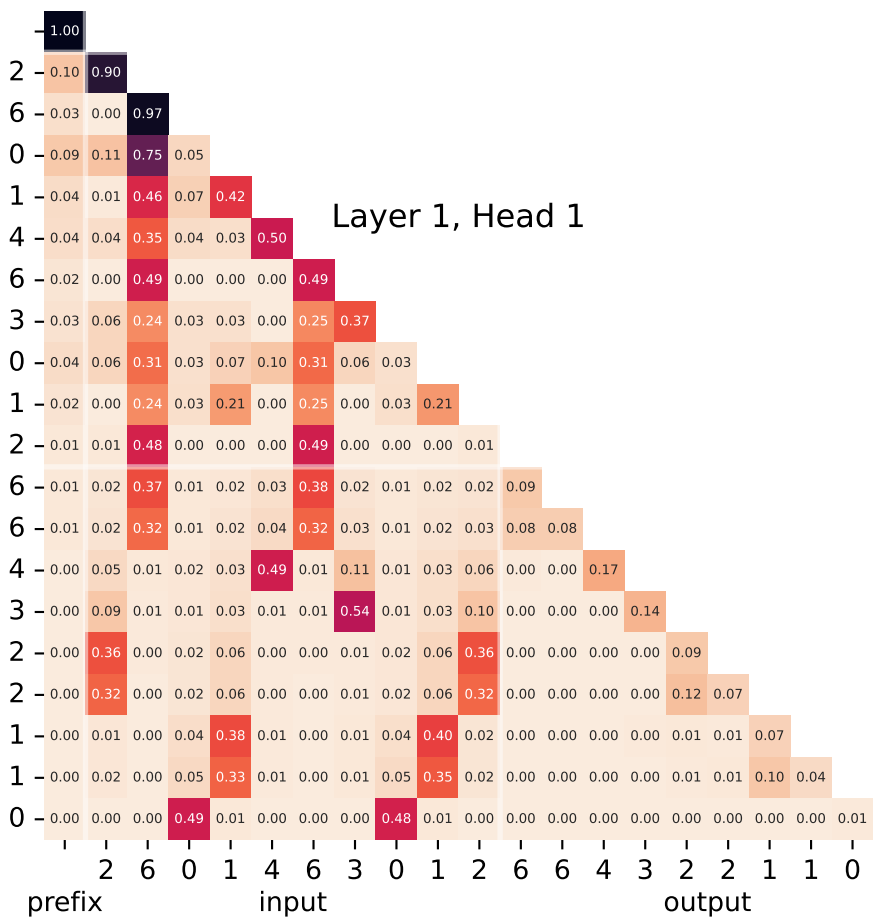

Supplement: supplementary_material [file attachment]

### Ascending sort attention

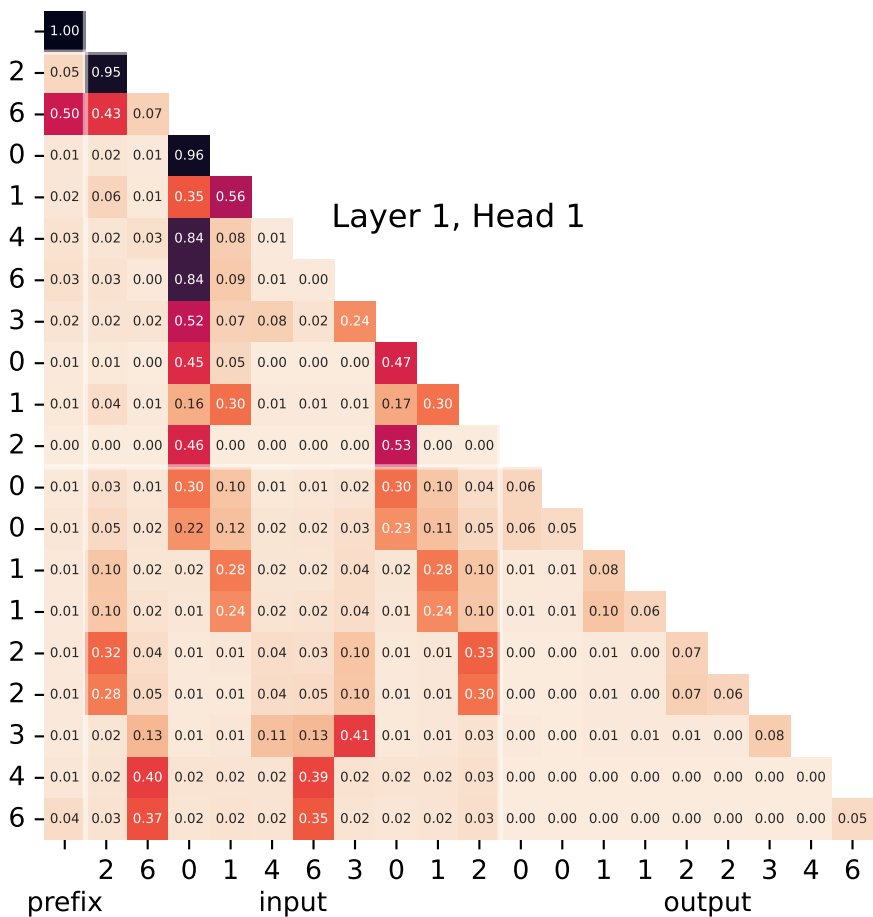

Supplement: supplementary_material [file attachment]
